# Supplementary material
Source: publisher site journal article supplement (https://www.degruyterbrill.com/publication/isbn/9783486599909/downloadAsset/9783486599909_Buchinformation.pdf)
Supplement: Supplementary file 1 [file 9783486599909_Buchinformation.pdf]

## Controlling anschaulich erklärt

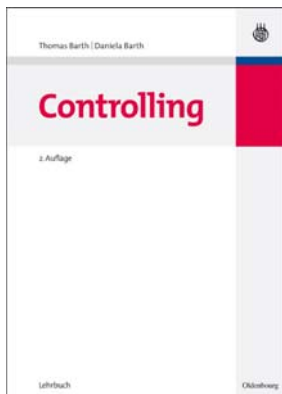

Thomas Barth | Daniela Barth

### Controlling

2. Aufl. 2008 | 391 Seiten | Broschur | € 29,80  
ISBN 978-3-486-58631-2

Der Einsatz leistungsfähiger Controllingsysteme, die die Entscheidungsträger in den Unternehmen in die Lage versetzen, rationale Entscheidungen zu treffen und so das Unternehmen zielorientiert zu steuern, ist unabdingbar geworden.

Zweck dieses Lehrbuchs ist es, den Leser mit den wichtigsten Konzepten und Techniken im operativen Controlling vertraut zu machen. Das Buch geht systematisch sowohl auf theoretische als auch praktische Aspekte der Ausgestaltung des Controlling ein und gibt darüber hinaus einen umfassenden Einblick in die verschiedenen Kostenrechnungssysteme. Die über 150 Abbildungen und Beispiele bereiten den Stoff anschaulich auf und dienen so dem besseren Verständnis.

---

Das Buch richtet sich an Studierende an Hochschulen als auch an Mitarbeiter in Unternehmen.

---

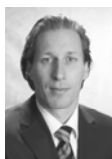

Prof. Dr. Thomas Barth leitet das Fachgebiet Controlling und Rechnungswesen an der Hochschule für Wirtschaft und Umwelt Nürtingen-Geislingen.

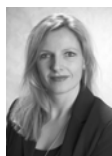

Dr. Daniela Barth ist seit 2002 im Bereich Corporate Controlling der Daimler AG tätig.

[www.oldenbourg.de](http://www.oldenbourg.de)

Pressereferat Wirtschafts- und Sozialwissenschaften – Mareike Kuttig  
Oldenbourg Wissenschaftsverlag | Rosenheimer Str. 145 | 81671 München  
Tel.: +49 89 45051-467 | Fax: +49 89 45051-292 | [kuttig@oldenbourg.de](mailto:kuttig@oldenbourg.de)

Alle Veröffentlichungen des Oldenbourg Verlags sind über den Buchhandel zu beziehen.

Bei Lieferung fallen Versandgebühren an. Rezensionsexemplare auf Anforderung.
